# Supplementary material for: Innate gene signature distinguishes humoral versus cytotoxic responses to influenza vaccination
Source: JCI journal article supplement (doi:10.1172/jci125372), 2019-03-07
Supplement: sd2 [file 2]

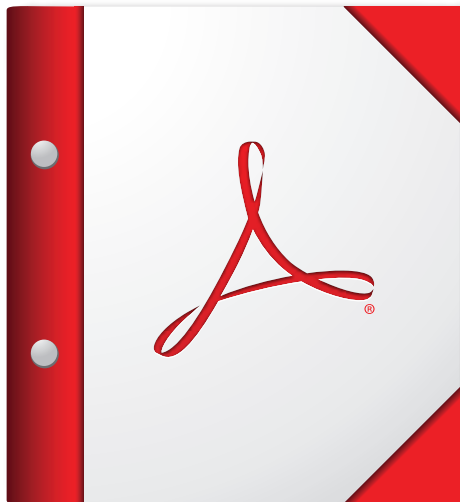

**Pour de meilleurs résultats, ouvrez ce porte-documents PDF dans Adobe Reader 9, ou dans Adobe Acrobat 9, ou version ultérieure.**

[Télécharger tout de suite Adobe Reader](#)
